# Supplementary material
Source: publisher site journal article supplement (https://www.spandidos-publications.com/268/downloadSupplementary)

Figure S1. Increased expression of PD-L1 protein at the cell surface in CDR1-AS-expressing Caco2 cells. (A) Increased CDR1-AS levels in control and CDR1-AS-expressing cells were confirmed by qRT-PCR. RNA extracted from CDR1-AS-expressing Caco2 cells, followed by treatment with RNase R, was included in the analysis. Data represent the mean  $\pm$  SD of triplicate experiments. \* $P$ <0.05. (B) qRT-PCR revealed the expression levels of the indicated transcripts in control and CDR1-AS-expressing Caco2 cells. Data are expressed as the mean  $\pm$  SD of triplicate experiments. \* $P$ <0.05. (C) FACS analyses revealed an increase in cell surface PDL1 protein expression in CDR1-AS-expressing Caco2 cells. A representative image of three independent experiments is presented. Gray indicates the negative control result using the isotype IgG. NC, negative control (non-CDR1-AS-expressing Caco2 cells); CDR1-AS, CDR1-AS-expressing Caco2 cells. (D) The percentage of PD-L1-positive cells compared with the negative control using the isotype IgG was determined by FACS analyses. Data represent the mean  $\pm$  SD of triplicate experiments. \* $P$ <0.05. CDR1-AS, cerebellar degeneration-related protein 1 transcript.

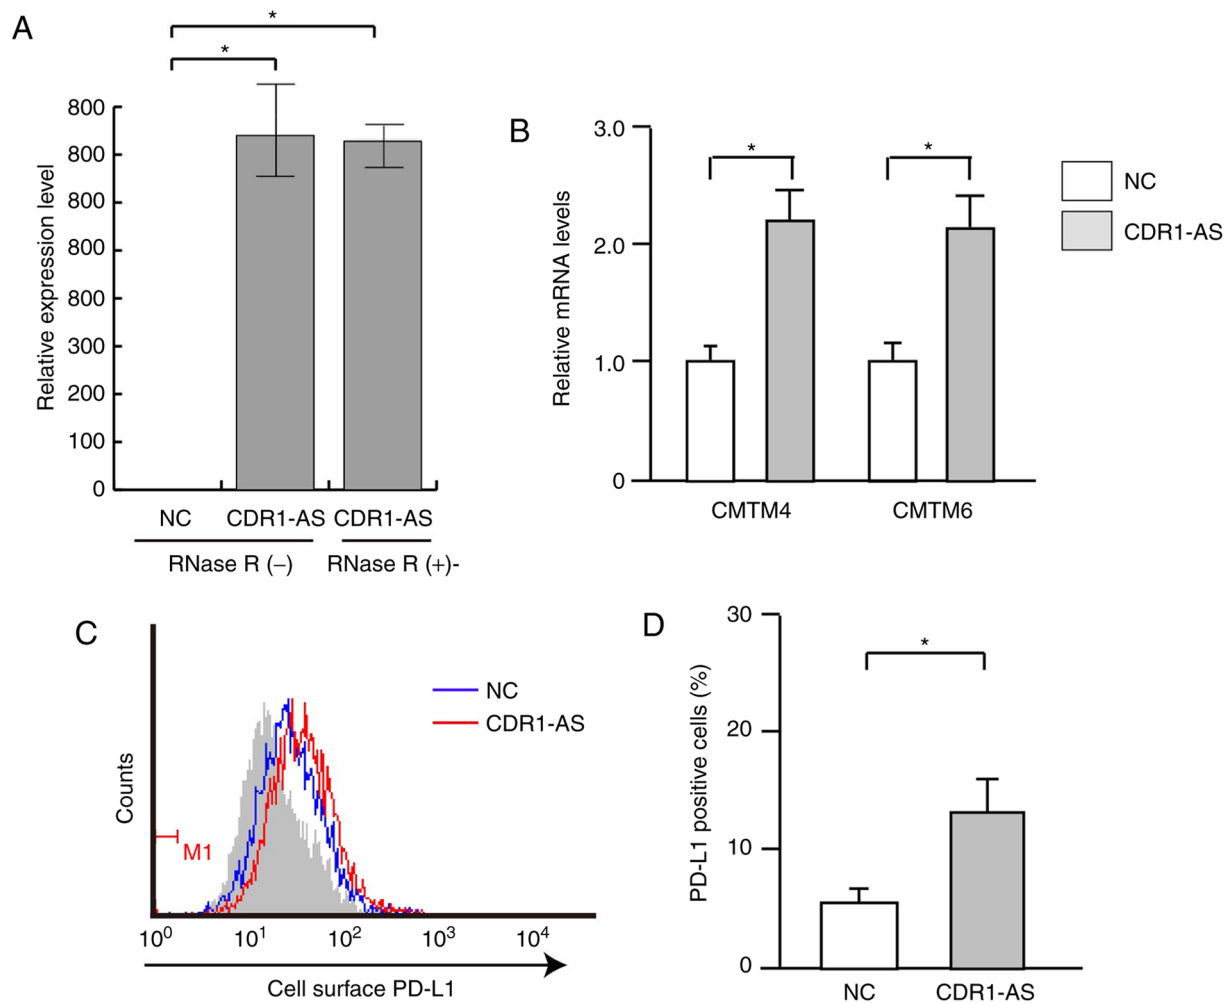

Supplement: Supplementary file 1 [file downloadSupplementary]
